# Supplementary material
Source: MDPI journal article supplement (https://www.mdpi.com/2073-4344/7/6/181)
Supplement: s1 [file s1]

# Supplementary Materials: Effect of Ce/Y Addition on Low-Temperature SCR Activity and SO<sub>2</sub> and H<sub>2</sub>O Resistance of MnO<sub>x</sub>/ZrO<sub>2</sub>/MWCNTs Catalysts

Lifu Dong, Yinming Fan, Wei Ling, Chao Yang and Bichun Huang

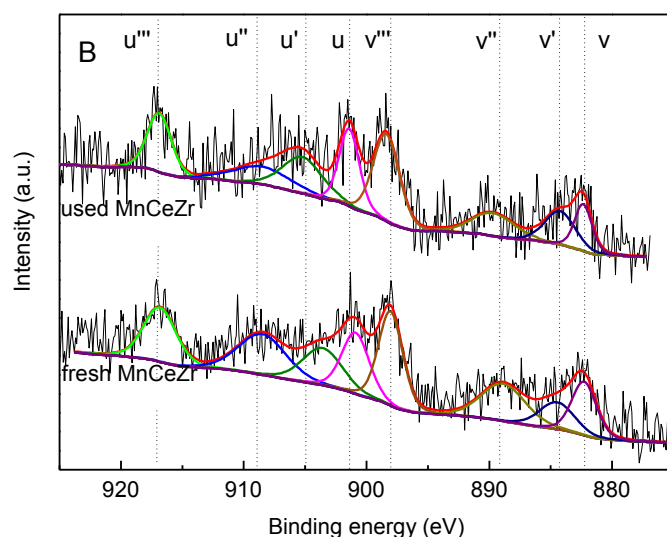

Figure S1. Ce 3d of catalysts before and after reaction in the presence of SO<sub>2</sub>.

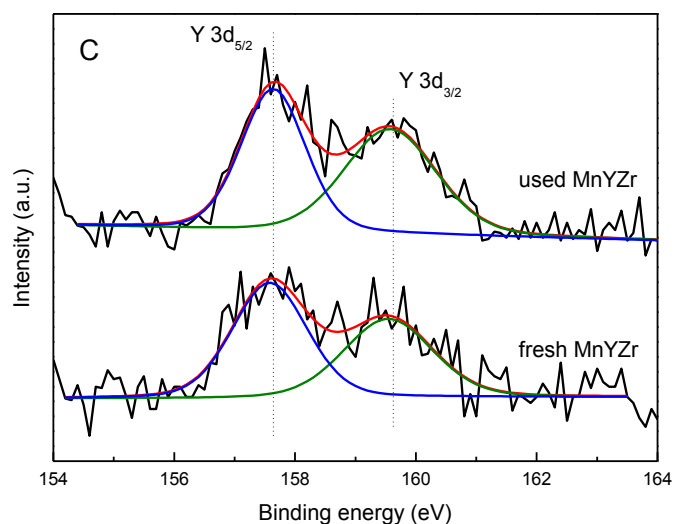

Figure S2. Y 3d of catalysts before and after reaction in the presence of SO<sub>2</sub>.
